# Supplementary material
Source: MDPI journal article supplement (https://www.mdpi.com/2073-4441/13/4/457)
Supplement: s1 [file s1]

## Supplementary Materials

### Fecal contamination and high nutrient levels pollute the watersheds of Wujiang, China

Raju Sekar<sup>1\*</sup>, Xin Jin<sup>2</sup>, Shuang Liu<sup>1</sup>, Jing Lu<sup>3</sup>, Jianwei Shen<sup>2</sup>, Yingya Zhou<sup>2</sup>, Ziyang Gong<sup>1</sup>, Xueying Feng<sup>1</sup>, Shengjie Guo<sup>1</sup> and Wenlong Li<sup>1</sup>

<sup>1</sup> Department of Biological Sciences, Xi'an Jiaotong-Liverpool University, Suzhou 215123, China; Shuang.Liu19@student.xjtlu.edu.cn (S.L.), Ziyang.Gong18@student.xjtlu.edu.cn (Z.G.), Xueying.Feng18@student.xjtlu.edu.cn (X.F.), Shengjie.Guo18@student.xjtlu.edu.cn (S.G.), Wenlong.Li@xjtlu.edu.cn (W.L.)

<sup>2</sup> Water Bureau of Wujiang District, 1000 Kaiping Road, Suzhou 215200, China; jxydky23@outlook.com (X.J.); motao123456@hotmail.com (J.S.); zyyviva@hotmail.com (Y.Z.)

<sup>3</sup> Futurepolis LLC, Suzhou 215021, China; jinglu.lyu@gmail.com (J.L.)

\* Correspondence: Sekar.Raju@xjtlu.edu.cn; Tel +86-512 8816 1656 (R.S.)

## Supplementary Tables

**Table S1.** Sampling locations in the rivers and the lake, including the geographic coordinates (GPS coordinates).

| Sampling locations | Name of River or lake  | GPS Latitude | GPS Longitude |
|--------------------|------------------------|--------------|---------------|
| 1                  | LiPuDang Lake (LPD)    | 120.73417313 | 31.05613997   |
| 2                  |                        | 120.73087603 | 31.05705390   |
| 3                  |                        | 120.72847411 | 31.05540297   |
| 4                  |                        | 120.73096052 | 31.05428854   |
| 5                  |                        | 120.73279783 | 31.05312585   |
| 6                  | XiDaGang River (XDG)   | 120.69197327 | 30.98629904   |
| 7                  |                        | 120.69869086 | 30.98628640   |
| 8                  |                        | 120.70044503 | 30.98349714   |
| 9                  |                        | 120.69903485 | 30.97990928   |
| 10                 |                        | 120.70080444 | 30.97521169   |
| 11                 | WuFangGang Canal (WFG) | 120.65343898 | 31.10217826   |
| 12                 |                        | 120.65683197 | 31.10219319   |
| 13                 |                        | 120.66093910 | 31.10204276   |
| 14                 |                        | 120.66782903 | 31.10019912   |
| 15                 |                        | 120.67236196 | 31.10188257   |
| 16                 | DaDeTang River (DDT)   | 120.53484946 | 30.83408890   |
| 17                 |                        | 120.52471474 | 30.83958967   |
| 18                 |                        | 120.51656149 | 30.85120798   |
| 19                 |                        | 120.50946102 | 30.86883742   |
| 20                 |                        | 120.49954087 | 30.88098221   |
| 21                 | ZiXingTang River       | 120.51865362 | 30.83171265   |

|           |                                                      |              |             |
|-----------|------------------------------------------------------|--------------|-------------|
| <b>22</b> | (ZXT)                                                | 120.51287010 | 30.81488494 |
| <b>23</b> |                                                      | 120.51177576 | 30.79952823 |
| <b>24</b> |                                                      | 120.50508834 | 30.78540934 |
| <b>25</b> |                                                      | 120.50349444 | 30.76295689 |
| <b>C1</b> | Taihu Lake Source<br>Protection Area<br>(TH/Control) | 120.47414303 | 31.19184156 |
| <b>C2</b> |                                                      | 120.46513081 | 31.18949200 |
| <b>C3</b> |                                                      | 120.46933651 | 31.18780322 |

**Table S2.** The methods used for measuring or testing the physicochemical parameters.

| Parameters tested          | Testing Methods (Chinese national standards)                                               |
|----------------------------|--------------------------------------------------------------------------------------------|
| Water and air temperatures | Thermometer                                                                                |
| pH                         | Portable pH meter                                                                          |
| DO                         | Electrochemical probe method (HJ 506-2009)                                                 |
| KMnO <sub>4</sub> index    | Acidic permanganate method (GB/T 11892-1989)                                               |
| TP                         | Ammonium molybdate spectrophotometry (GB/T 11893-1989)                                     |
| PO <sub>4</sub> -P         | Alkali fusion-Mo-Sb Anti spectrophotometric method (HJ632-2011)                            |
| TN                         | Alkaline potassium persulfate digestion UV spectrophotometry<br>(HJ 636-2012)              |
| NH <sub>4</sub> -N         | Nessler's reagent spectrophotometry HJ 535-2009                                            |
| NO <sub>2</sub> -N         | Spectrophotometry GB/T 7493-1987                                                           |
| NO <sub>3</sub> -N         | Spectrophotometry (in trials) HJ/T 346-2007                                                |
| TOC                        | Combustion oxidation nondispersive infrared absorption method<br>HJ 501-2009               |
| COD                        | Dichromate method HJ 828-2017                                                              |
| BOD                        | Determination of biochemical oxygen demand after 5 days (BOD <sub>5</sub> )<br>HJ 505-2009 |

**Table S3.** Physicochemical and microbiological characteristics of LiPuDang (LPD) with statistical analyses.

|                           | August      |             | September   |             | October     |             | Guideline value (MEP Surface Water class III) | P-Value(difference between months) | P-Value(difference between samples) |
|---------------------------|-------------|-------------|-------------|-------------|-------------|-------------|-----------------------------------------------|------------------------------------|-------------------------------------|
|                           | Range       | Mean±SD     | Range       | Mean±SD     | Range       | Mean±SD     |                                               |                                    |                                     |
| AT (°C)                   | 30-33.9     | 31.4±1.6    | 27.2-30     | 28.4±1.0    | 21.8-24.4   | 22.8±1.0    | -                                             | 4.79e-07 ***                       | 0.968                               |
| WT (°C)                   | 31-32.6     | 31.6±0.6    | 25.6-26.6   | 26.1±0.4    | 21.5-22     | 21.7±0.2    | -                                             | 9.65e-13 ***                       | 0.981                               |
| pH                        | 8.14-8.88   | 8.40±0.32   | 8.1-8.94    | 8.5±0.3     | 8.11-8.29   | 8.23±0.07   | 6~9                                           | 0.304                              | 0.0933                              |
| EC                        | 371-400     | 391±12      | 420-429     | 423.6±3.4   | 417-424     | 420±3       | -                                             | 2e-05 ***                          | 0.638                               |
| DO (mg/L)                 | 6.74-8.92   | 7.62±0.91   | 4.19-6.84   | 6.0±1.1     | 6.40-7.25   | 6.87±0.37   | ≥5mg/L                                        | 0.028 *                            | 0.825                               |
| BOD <sub>5</sub> (mg/L)   | 5.4-7.3     | 6.1±0.8     | 1.9-27.2    | 7.3±11.1    | 1.6-2       | 1.8±0.2     | ≤4mg/L                                        | 0.397                              | 0.435                               |
| COD (mg/L)                | 51-86       | 68±14       | 25-139      | 52±49       | 18-22       | 20±2        | ≤20mg/L                                       | 0.0695                             | 0.274                               |
| KMnO <sub>4</sub> (mg/L)  | 6.2-8       | 7.1±0.6     | 6.8-7.8     | 7.2±0.4     | 5.5-6.9     | 6.0±0.5     | ≤6mg/L                                        | 0.00928 **                         | 0.568                               |
| TN (mg/L)                 | 2.01-3.56   | 2.52±0.62   | 1.78-5.42   | 2.7±1.5     | 1.58-2.59   | 2.18±0.48   | ≤1mg/L                                        | 0.741                              | 0.39                                |
| TP (mg/L)                 | 0.12-0.23   | 0.17±0.04   | 0.02-0.04   | 0.03±0.01   | 0.12-0.16   | 0.14±0.02   | ≤0.2mg/L (≤0.05mg/L *)                        | 3.32e-06 ***                       | 0.68                                |
| NO <sub>3</sub> -N (mg/L) | 0.25-0.66   | 0.54±0.17   | 0.94-1.48   | 1.24±0.23   | 0.32-0.59   | 0.44±0.12   | ≤10 mg/L                                      | 1.78e-05 ***                       | 0.821                               |
| NO <sub>2</sub> -N (mg/L) | 0.005-0.08  | 0.035±0.029 | 0.043-0.083 | 0.055±0.016 | 0.064-0.077 | 0.071±0.005 | ≤0.15mg/L                                     | 0.0368 *                           | 0.982                               |
| PO <sub>4</sub> -P (mg/L) | 0.1-0.18    | 0.13±0.03   | ND-0.01     | <0.01       | 0.02-0.03   | 0.03±0.00   | <0.02 mg/L                                    | 5.53e-07 ***                       | 0.707                               |
| NH <sub>4</sub> -N (mg/L) | 0.039-0.058 | 0.052±0.008 | 0.040-0.050 | 0.04±0.01   | 0.290-0.530 | 0.410±0.094 | ≤1mg/L                                        | 1.76e-07 ***                       | 0.974                               |
| TOC (mg/L)                | 9.2-10.5    | 9.8±0.5     | 6.5-7       | 6.7±0.2     | 6.4-7.4     | 6.8±0.4     | -                                             | 3.63e-08 ***                       | 0.828                               |
| Chl <i>a</i> (ug/L)       | 122.5-166.1 | 142.8±19.5  | 174.9-502.2 | 334.7±134.5 | 103.9-124.3 | 111.29±8.30 | -                                             | 0.00145 **                         | 0.191                               |
| TC (Log cfu/mL)           | 2.48-3.36   | 3.09±2.85   | 1.48-2.98   | 2.39±2.60   | 2.52-2.87   | 2.70±2.21   | -                                             | 0.000623 ***                       | 0.225                               |

|                       |           |                  |           |                  |           |                  |    |        |       |
|-----------------------|-----------|------------------|-----------|------------------|-----------|------------------|----|--------|-------|
| FC (Log<br>cfu/100mL) | 2.40-3.24 | <b>2.90±2.79</b> | 2.40-3.80 | <b>3.41±3.38</b> | 2.35-3.05 | <b>2.67±2.57</b> | ≤3 | 0.0952 | 0.936 |
|-----------------------|-----------|------------------|-----------|------------------|-----------|------------------|----|--------|-------|

\* Statistically significant difference at  $p < 0.05$ ; \*\* Statistically significant difference at  $p < 0.01$ ; \*\*\* Statistically significant difference at  $p < 0.001$ ; MEP: Ministry of Environmental Protection, PR China. The values exceeded the MEP guideline values are indicated in bold.

**Table S4.** Physicochemical and microbiological characteristics of XiDaGang (XDG) with statistical analyses.

|                           | August      |             | September  |             | October     |             | Guideline value (MEP Surface Water class III) | P-Value(difference between months) | P-Value(difference between samples) |
|---------------------------|-------------|-------------|------------|-------------|-------------|-------------|-----------------------------------------------|------------------------------------|-------------------------------------|
|                           | Range       | Mean±SD     | Range      | Mean±SD     | Range       | Mean±SD     |                                               |                                    |                                     |
| AT (°C)                   | 32.8-33.7   | 33.4±0.4    | 25.6-26.4  | 26.2±0.3    | 22.1-23.6   | 23.0±0.6    | -                                             | 4.06e-13 ***                       | 0.954                               |
| WT (°C)                   | 32.3-32.8   | 32.5±0.2    | 24.9-25.8  | 25.3±0.4    | 21.1-22.5   | 21.9±0.5    | -                                             | 7.38e-14 ***                       | 0.973                               |
| pH                        | 8.14-8.24   | 8.19±0.04   | 7.7-7.77   | 7.74±0.03   | 7.79-7.94   | 7.85±0.06   | 6~9                                           | 4.31e-09 ***                       | 0.823                               |
| EC                        | 305-310     | 308±2       | 380-385    | 383±2       | 426-430     | 428±1       | -                                             | <2e-16 ***                         | 1                                   |
| DO (mg/L)                 | 7.33-7.72   | 7.44±0.17   | 4.07-8.55  | 5.10±1.93   | 6.2-6.93    | 6.59±0.30   | ≥5mg/L                                        | 0.0207 *                           | 0.939                               |
| BOD <sub>5</sub> (mg/L)   | 1.6-3.5     | 2.4±0.7     | 1.4-2.5    | 2.1±0.5     | 1.5-1.8     | 1.6±0.1     | ≤4mg/L                                        | 0.0904                             | 0.0196*                             |
| COD (mg/L)                | 14-49       | 31±14       | 11-31      | 21±9        | 10-11       | 10±0        | ≤20mg/L                                       | 0.0165 *                           | 0.103                               |
| KMnO <sub>4</sub> (mg/L)  | 4.1-4.6     | 4.4±0.2     | 3.3-3.6    | 3.5±0.1     | 3.6-4.3     | 3.9±0.3     | ≤6mg/L                                        | 7.82e-05 ***                       | 0.488                               |
| TN (mg/L)                 | 0.92-2.07   | 1.47±0.53   | 1.45-2.22  | 1.72±0.30   | 1.89-2.78   | 2.30±0.36   | ≤1mg/L                                        | 0.0206 *                           | 0.0135*                             |
| TP (mg/L)                 | 0.07-0.18   | 0.11±0.05   | 0.08-0.14  | 0.10±0.02   | 0.08-0.1    | 0.09±0.01   | ≤0.2mg/L (≤0.05mg/L <sup>a</sup> )            | 0.776                              | 0.4                                 |
| NO <sub>3</sub> -N (mg/L) | 0.24-0.37   | 0.31±0.05   | 0.58-1.34  | 0.80±0.32   | 0.19-0.41   | 0.29±0.09   | ≤10 mg/L                                      | 0.00179 **                         | 0.305                               |
| NO <sub>2</sub> -N (mg/L) | 0.055-0.200 | 0.113±0.071 | 0.062-0.08 | 0.073±0.007 | 0.116-0.133 | 0.122±0.007 | ≤0.15mg/L                                     | 0.182                              | 0.0809                              |
| PO <sub>4</sub> -P (mg/L) | 0.06-0.15   | 0.09±0.04   | 0.07-0.09  | 0.08±0.01   | 0.07-0.09   | 0.08±0.01   | <0.02 mg/L                                    | 0.576                              | 0.0501                              |
| NH <sub>4</sub> -N (mg/L) | 0.314-1.430 | 0.901±0.476 | 0.63-0.76  | 0.698±0.048 | 1.47-1.77   | 1.618±0.107 | ≤1mg/L                                        | 0.000615 ***                       | 0.22                                |
| TOC (mg/L)                | 6.5-6.6     | 6.5±0.0     | 3.9-4      | 4.0±0.1     | 4-4.1       | 4.1±0.0     | -                                             | <2e-16 ***                         | 0.989                               |
| Chl <i>a</i> (ug/L)       | 12.4-43.3   | 20.1±13.0   | 16.6-62.8  | 47.2±18.8   | 6.5-15.6    | 11.62±3.86  | -                                             | 0.00321 **                         | 0.665                               |
| TC (Log cfu/mL)           | 1.78-2.71   | 2.26±2.27   | 0.00-1.00  | 0.60±0.74   | 1.18-2.20   | 1.83±1.77   | -                                             | 0.0978                             | 0.0476*                             |
| FC (Log)                  | 2.40-3.18   | 2.90±2.68   | 3.14-3.87  | 3.63±3.44   | 2.88-3.36   | 3.15±2.75   | ≤3                                            | 0.00397**                          | 0.482                               |

|            |  |  |  |  |  |  |  |  |  |
|------------|--|--|--|--|--|--|--|--|--|
| cfu/100mL) |  |  |  |  |  |  |  |  |  |
|------------|--|--|--|--|--|--|--|--|--|

\* Statistically significant difference at  $p < 0.05$ ; \*\* Statistically significant difference at  $p < 0.01$ ; \*\*\* Statistically significant difference at  $p < 0.001$ ; MEP: Ministry of Environmental Protection, PR China. The values exceeded the MEP guideline values are indicated in bold.

**Table S5.** Physicochemical and microbiological characteristics of WuFangGang (WFG) with statistical analyses.

|                           | August              |                  | September         |                  | October           |                  | Guideline value (MEP Surface Water class III) | P-Value(difference between months) | P-Value(difference between samples) |
|---------------------------|---------------------|------------------|-------------------|------------------|-------------------|------------------|-----------------------------------------------|------------------------------------|-------------------------------------|
|                           | Range               | Mean±SD          | Range             | Mean±SD          | Range             | Mean±SD          |                                               |                                    |                                     |
| AT (°C)                   | 32.4-34.5           | 33.3±0.9         | 25.4-27.3         | 26.1±0.8         | 20.7-22.5         | 21.6±0.8         | -                                             | 1.43e-10 ***                       | 0.976                               |
| WT (°C)                   | 33.1-33.4           | 33.3±0.1         | 24.4-25.7         | 25.0±0.5         | 20.4-21.0         | 20.7±0.2         | -                                             | 9.6e-16 ***                        | 0.914                               |
| pH                        | 7.78-7.96           | 7.89±0.08        | 7.49-7.69         | 7.60±0.08        | 7.52-7.72         | 7.58±0.08        | 6~9                                           | 8.31e-05 ***                       | 0.209                               |
| EC                        | 260-357             | 289±41           | 324-370           | 334±20           | 308-464           | 361±66           | -                                             | 0.0834                             | 0.022*                              |
| DO (mg/L)                 | <b>4.58</b> -7.31   | 6.05±1.00        | <b>3.63-4.35</b>  | <b>3.98±0.32</b> | <b>1.98</b> -6.88 | <b>4.43±2.24</b> | ≥5mg/L                                        | 0.0938                             | 0.585                               |
| BOD <sub>5</sub> (mg/L)   | 1.3-2.1             | 1.7±0.3          | 1.3-2.3           | 1.8±0.4          | 1.6- <b>4.9</b>   | 2.8±1.6          | ≤4mg/L                                        | 0.159                              | 0.4                                 |
| COD (mg/L)                | 10- <b>31</b>       | <b>21±10</b>     | 11- <b>27</b>     | 18±7             | 10- <b>33</b>     | 17±10            | ≤20mg/L                                       | 0.775                              | 0.352                               |
| KMnO <sub>4</sub> (mg/L)  | 3.4-4.2             | 3.8±0.3          | 3.2-3.4           | 3.3±0.1          | 3.3- <b>6.8</b>   | 4.7±1.6          | ≤6mg/L                                        | 0.0892                             | 0.369                               |
| TN (mg/L)                 | 0.77- <b>2.21</b>   | <b>1.26±0.63</b> | <b>1.63-4.82</b>  | <b>2.69±1.33</b> | 0.97- <b>7.28</b> | <b>2.81±2.61</b> | ≤1mg/L                                        | 0.324                              | 0.35                                |
| TP (mg/L)                 | 0.09-0.19           | 0.14±0.05        | 0.08-0.13         | 0.10±0.02        | 0.07- <b>0.66</b> | <b>0.23±0.24</b> | ≤0.2mg/L (≤0.05mg/L *)                        | 0.356                              | 0.149                               |
| NO <sub>3</sub> -N (mg/L) | 0.09-0.57           | 0.21±0.20        | 0.6-1.41          | 0.85±0.32        | 0.24-0.35         | 0.29±0.05        | ≤10 mg/L                                      | 0.00133 **                         | 0.4                                 |
| NO <sub>2</sub> -N (mg/L) | 0.023-0.034         | 0.027±0.005      | 0.026-0.037       | 0.030±0.005      | 0.029-0.042       | 0.037±0.05       | ≤0.15mg/L                                     | 0.0161 *                           | 0.169                               |
| PO <sub>4</sub> -P (mg/L) | <b>0.06-0.14</b>    | <b>0.10±0.03</b> | <b>0.06-0.08</b>  | <b>0.07±0.01</b> | <b>0.06-0.53</b>  | <b>0.19±0.20</b> | <0.02 mg/L                                    | 0.265                              | 0.19                                |
| NH <sub>4</sub> -N (mg/L) | 0.254- <b>1.350</b> | 0.731±0.527      | 0.86- <b>1.18</b> | 0.95±0.13        | 0.54- <b>6.82</b> | <b>2.27±2.61</b> | ≤1mg/L                                        | 0.272                              | 0.16                                |
| TOC (mg/L)                | 5.2-6.1             | 5.7±0.4          | 3.7-4.0           | 3.8±0.1          | 3.6-5.4           | 4.2±0.7          | -                                             | 0.000133 ***                       | 0.347                               |
| Chl <i>a</i> (ug/L)       | 9.6-12.0            | 10.7±0.9         | 29.7-56.2         | 42.3±12.6        | 9.06-12.07        | 10.49±1.24       | -                                             | 1.84E-05                           | 0.382                               |
| TC (Log cfu/mL)           | 2.59-3.24           | 2.99±2.74        | 1.78-3.18         | 2.63±2.78        | 3.11-3.74         | 3.42±3.22        | -                                             | 0.0271 *                           | 0.39                                |
| FC (Log cfu/100mL)        | <b>3.57-4.20</b>    | <b>3.95±3.71</b> | <b>3.98-4.49</b>  | <b>4.35±3.89</b> | <b>3.67-5.10</b>  | <b>4.65±4.70</b> | ≤3                                            | 0.324                              | 0.0539                              |

**Table S6.** Physicochemical and microbiological characteristics of DeDeTang (DDT) with statistical analyses.

|                           | August      |             | September   |             | October     |             | Guideline value (MEP Surface Water class III) | P-Value(difference between months) | P-Value(difference between samples) |
|---------------------------|-------------|-------------|-------------|-------------|-------------|-------------|-----------------------------------------------|------------------------------------|-------------------------------------|
|                           | Range       | Mean±SD     | Range       | Mean±SD     | Range       | Mean±SD     |                                               |                                    |                                     |
| AT (°C)                   | 31.2-34.1   | 32.7±1.1    | 26-32.1     | 28.4±2.3    | 20.9-22.2   | 21.6±0.5    | -                                             | 2.69e-07 ***                       | 0.872                               |
| WT (°C)                   | 32.4-34.2   | 33.3±0.6    | 25.6-26.6   | 26±0.4      | 21.3-22     | 21.7±0.3    | -                                             | 1.88e-13 ***                       | 0.997                               |
| pH                        | 7.2-8.1     | 7.7±0.4     | 7.31-7.71   | 7.47±0.18   | 7.36-7.57   | 7.5±0.1     | 6-9                                           | 0.207                              | 0.0516                              |
| EC                        | 310-400     | 365±43      | 378-521     | 460±73      | 376-536     | 457±79      | -                                             | 0.0753                             | 0.0029**                            |
| DO (mg/L)                 | 5.24-7.58   | 6.39±1.05   | 4.26-5.68   | 4.63±0.59   | 4.68-6.87   | 6.01±0.9    | ≥5mg/L                                        | 0.0184 *                           | 0.842                               |
| BOD <sub>5</sub> (mg/L)   | 1.3-4.1     | 2.1±1.2     | 1.2-2.4     | 2.0±0.5     | 1.8-2.2     | 2.0±0.16    | ≤4mg/L                                        | 0.946                              | 0.211                               |
| COD (mg/L)                | 12-48       | 26±15       | 21-25       | 23±2        | 18-27       | 24±4        | ≤20mg/L                                       | 0.886                              | 0.888                               |
| KMnO <sub>4</sub> (mg/L)  | 5.1-5.7     | 5.4±0.26    | 3.8-4.5     | 4.2±0.29    | 3.3-4.1     | 3.8±0.33    | ≤6mg/L                                        | 5.02e-06 ***                       | 0.472                               |
| TN (mg/L)                 | 0.73-0.97   | 0.87±0.1    | 1.79-2.07   | 1.97±0.11   | 1.37-1.48   | 1.41±0.04   | ≤1mg/L                                        | 8.63e-10 ***                       | 0.794                               |
| TP (mg/L)                 | 0.14-0.17   | 0.16±0.01   | 0.11-0.15   | 0.13±0.02   | 0.08-0.1    | 0.09±0.01   | ≤0.2mg/L (≤0.05mg/L *)                        | 4.9e-06 ***                        | 0.916                               |
| NO <sub>3</sub> -N (mg/L) | 0.21-0.37   | 0.28±0.07   | 0.66-0.94   | 0.82±0.11   | 0.19-0.33   | 0.26±0.05   | ≤10 mg/L                                      | 1.51e-07 ***                       | 0.892                               |
| NO <sub>2</sub> -N (mg/L) | 0.047-0.093 | 0.065±0.019 | 0.039-0.145 | 0.073±0.046 | 0.046-0.082 | 0.061±0.016 | ≤0.15mg/L                                     | 0.798                              | 0.00105**                           |
| PO <sub>4</sub> -P (mg/L) | 0.08-0.15   | 0.11±0.03   | 0.07-0.09   | 0.08±0.01   | 0.06-0.08   | 0.07±0.01   | <0.02 mg/L                                    | 0.00728 **                         | 0.763                               |
| NH <sub>4</sub> -N (mg/L) | 0.045-0.306 | 0.113±0.111 | 0.040-0.190 | 0.072±0.066 | 0.070-0.340 | 0.158±0.117 | ≤1mg/L                                        | 0.427                              | 0.177                               |
| TOC (mg/L)                | 4.4-5.1     | 4.7±0.3     | 4.6-5.2     | 4.9±0.31    | 4.3-4.9     | 4.6±0.25    | -                                             | 0.204                              | 0.0341*                             |
| Chl <i>a</i> (ug/L)       | 6.3-61.7    | 19.4±23.7   | 19.5-63.2   | 32.5±18.4   | 7.3-13.1    | 10.0±2.6    | -                                             | 0.163                              | 0.467                               |
| TC (Log cfu/mL)           | 2.00-3.22   | 2.67±2.82   | 1.18-2.24   | 1.85±1.84   | 2.04-3.60   | 3.02±3.22   | -                                             | 0.662                              | 0.645                               |
| FC (Log cfu/100mL)        | 2.40-3.88   | 3.40±3.50   | 3.42-4.40   | 4.22±4.02   | 1.88-3.98   | 3.52±3.56   | ≤3                                            | 0.0465 *                           | 0.0628                              |

**Table S7.** Physicochemical and microbiological characteristics of ZiXingTang (ZXT) river with statistical analyses.

|                           | August            |                   | September         |                  | October          |                  | Guideline value (MEP Surface Water class III) | P-Value(difference between months) | P-Value(difference between samples) |
|---------------------------|-------------------|-------------------|-------------------|------------------|------------------|------------------|-----------------------------------------------|------------------------------------|-------------------------------------|
|                           | Range             | Mean±SD           | Range             | Mean±SD          | Range            | Mean±SD          |                                               |                                    |                                     |
| AT (°C)                   | 32.8-35.8         | 34.1±1.1          | 28.6-30.3         | 29.3±0.7         | 22.2-23.9        | 22.9±0.7         | -                                             | 4.39e-10 ***                       | 0.867                               |
| WT (°C)                   | 32.8-35.0         | 33.7±0.9          | 26.3-27.8         | 27.1±0.6         | 22-24.5          | 22.7±1.0         | -                                             | 4e-10 ***                          | 0.959                               |
| pH                        | 7.5-7.7           | 7.6±0.1           | 7.2-7.7           | 7.4±0.6          | 7.5-7.7          | 7.6±0.1          | 6~9                                           | 0.103                              | 0.271                               |
| EC                        | 288-429           | 326±59            | 373-626           | 447±111          | 351-504          | 412±77           | -                                             | 0.109                              | 0.0162*                             |
| DO (mg/L)                 | 5.88-7.41         | 6.49±0.57         | <b>4.69-6.46</b>  | 5.45±0.85        | 5.46-8.51        | 7.06±1.38        | ≥5mg/L                                        | 0.0672                             | 0.175                               |
| BOD <sub>5</sub> (mg/L)   | 1.1-3.7           | 2±1.1             | 2.1-2.6           | 2.3±0.2          | 1.7-2.8          | 2.3±0.4          | ≤4mg/L                                        | 0.623                              | 0.019*                              |
| COD (mg/L)                | 10- <b>39</b>     | 18±12             | 10- <b>25</b>     | <b>20±6</b>      | 19- <b>31</b>    | <b>24±5</b>      | ≤20mg/L                                       | 0.558                              | 0.140                               |
| KMnO <sub>4</sub> (mg/L)  | 4.1-5.6           | 4.8±0.6           | 3.6-4.6           | 4.2±0.4          | 3.9-4.6          | 4.3±0.3          | ≤6mg/L                                        | 0.177                              | 0.324                               |
| TN (mg/L)                 | 0.55- <b>1.13</b> | 0.78±0.24         | <b>1.68-2.3</b>   | <b>1.97±0.23</b> | <b>1.27-1.78</b> | <b>1.39±0.21</b> | ≤1mg/L                                        | 1.1e-05 ***                        | 0.881                               |
| TP (mg/L)                 | 0.19- <b>0.21</b> | 0.2±0.008         | 0.14-0.16         | 0.15±0.01        | 0.11-0.17        | 0.13±0.03        | ≤0.2mg/L (≤0.05mg/L *)                        | 2.08e-05 ***                       | 0.529                               |
| NO <sub>3</sub> -N (mg/L) | 0.14-0.62         | 0.32±0.189        | 0.84-0.96         | 0.90±0.05        | 0.2-0.35         | 0.28±0.06        | ≤10 mg/L                                      | 3.21e-06 ***                       | 0.864                               |
| NO <sub>2</sub> -N (mg/L) | 0.057-0.14        | 0.09±0.039        | 0.024-0.047       | 0.036±0.009      | 0.02-0.085       | 0.042±0.025      | ≤0.15mg/L                                     | 0.0214 *                           | 0.144                               |
| PO <sub>4</sub> -P (mg/L) | 0.028-0.111       | 0.06±0.039        | 0.040-0.050       | 0.04±0.004       | 0.040-0.110      | 0.07±0.035       | ≤1mg/L                                        | 0.281                              | 0.155                               |
| NH <sub>4</sub> -N (mg/L) | <b>0.11-0.2</b>   | <b>0.15±0.044</b> | <b>0.1-0.13</b>   | <b>0.1±0.02</b>  | <b>0.07-0.1</b>  | <b>0.08±0.01</b> | <0.02 mg/L                                    | 0.00757 **                         | 0.338                               |
| TOC (mg/L)                | 4-4.6             | 4.3±0.3           | 4.4-5.2           | 4.9±0.4          | 4.1-4.7          | 4.4±0.3          | -                                             | 0.0352 *                           | 0.0157*                             |
| Chl <i>a</i> (ug/L)       | 3.46-32.6         | 18.7±11.7         | 10.7-60.3         | 30.9±18.7        | 8.6-12.8         | 10.5±1.7         | -                                             | 0.0745                             | 0.805                               |
| TC (Log cfu/mL)           | 1.70-3.30         | 2.69±2.93         | 0.00-2.98         | 2.63±2.63        | 1.40-2.29        | 2.15±1.83        | -                                             | 0.537                              | 0.163                               |
| FC (Log cfu/100mL)        | 2.40- <b>3.48</b> | <b>3.24±3.00</b>  | 2.94- <b>4.27</b> | <b>4.00±3.83</b> | <b>3.21-4.01</b> | <b>3.71±3.62</b> | ≤3                                            | 0.0755                             | 0.0758                              |

**Table S8.** Physicochemical and microbiological characteristics of samples collected from Taihu lake source water protection area (Control locations) with statistical analyses.

|                           | August            |            | September         |                  | October       |           | Guideline value (MEP Surface Water class III) | P-Value(difference between months) | P-Value(difference between samples) |
|---------------------------|-------------------|------------|-------------------|------------------|---------------|-----------|-----------------------------------------------|------------------------------------|-------------------------------------|
|                           | Range             | Mean±SD    | Range             | Mean±SD          | Range         | Mean±SD   |                                               |                                    |                                     |
| AT (°C)                   | 30.8-31.6         | 31.2±0.4   | 25.7-27.1         | 26.4±0.7         | 22.3-22.7     | 22.5±0.2  | -                                             | 1.7e-06 ***                        | 0.801                               |
| WT (°C)                   | 30.6-30.7         | 30.7±0.1   | 25.7              | 25.7±0           | 20.4-20.5     | 20.5±0.1  | -                                             | 9.36e-12 ***                       | 0.993                               |
| pH                        | 8.44- <b>9.17</b> | 8.88±0.39  | 8.95- <b>9.32</b> | <b>9.19±0.21</b> | 8.33-8.44     | 8.39±0.06 | 6-9                                           | 0.0234 *                           | 0.351                               |
| EC                        | 305-318           | 311±7      | 302-309           | 305±4            | 320-321       | 320±0.6   | -                                             | 0.0123 *                           | 0.44                                |
| DO (mg/L)                 | 8.53-10.98        | 10.00±1.30 | -                 | -                | -             | -         | ≥5mg/L                                        | -                                  | -                                   |
| BOD <sub>5</sub> (mg/L)   | 1.2-1.3           | 1.3±0.1    | 1.3-1.4           | 1.3±0.1          | 1.5-1.7       | 1.6±0.1   | ≤4mg/L                                        | 0.0095 **                          | 0.81                                |
| COD (mg/L)                | 10                | 10±0       | 13- <b>22</b>     | 17±5             | 17- <b>21</b> | 18±2      | ≤20mg/L                                       | 0.0206 *                           | 1                                   |
| KMnO <sub>4</sub> (mg/L)  | 2.8-3.1           | 2.9±0.2    | 2.4-2.7           | 2.6±0.2          | 3.2-3.3       | 3.3±0.1   | ≤6mg/L                                        | 0.00171 **                         | 1                                   |
| TN (mg/L)                 | 0.33-0.5          | 0.41±0.09  | <b>1.21-1.24</b>  | <b>1.23±0.02</b> | 0.26-0.5      | 0.36±0.01 | ≤1mg/L                                        | 3.27e-05 ***                       | 0.973                               |
| TP (mg/L)                 | 0.03              | 0.03±0     | 0.01-0.02         | 0.01±0.01        | 0.01-0.02     | 0.02±0.01 | ≤0.2mg/L (≤0.05mg/L °)                        | 0.011 *                            | 0.381                               |
| NO <sub>3</sub> -N (mg/L) | 0.11-0.18         | 0.14±0.04  | 0.24-0.33         | 0.28±0.05        | 0.13-0.15     | 0.14±0.01 | ≤10 mg/L                                      | 0.00294 **                         | 0.53                                |
| NO <sub>2</sub> -N (mg/L) | 0.003-0.1         | 0.06±0.004 | ND                | ND               | ND            | ND        | ≤0.15mg/L                                     | 0.0187 *                           | 0.595                               |
| PO <sub>4</sub> -P (mg/L) | ND                | ND         | ND                | ND               | ND            | ND        | <0.02 mg/L                                    | -                                  | -                                   |

|                           |             |             |           |           |           |           |        |            |       |
|---------------------------|-------------|-------------|-----------|-----------|-----------|-----------|--------|------------|-------|
| NH <sub>4</sub> -N (mg/L) | 0.031-0.061 | 0.042±0.017 | 0.04      | 0.04±0    | 0.03      | 0.03±0    | ≤1mg/L | 0.6        | 0.484 |
| TOC (mg/L)                | 5.5-8.6     | 7.0±1.5     | 3.2-4.1   | 3.5±0.5   | 3.5-3.7   | 3.6±0.1   | -      | 0.00642 ** | 0.77  |
| Chl <i>a</i> (ug/L)       | 3.10-3.56   | 3.33±0.24   | 2.88-5.22 | 4.20±1.20 | 2.12-8.31 | 4.33±3.45 | -      | 0.824      | 0.102 |
| TC (Log cfu/mL)           | 1.13-1.22   | 1.16±0.28   | -         | -         | 1.48-1.81 | 1.31±1.62 | -      | 0.0207 *   | 0.706 |
| FC (Log cfu/100mL)        | 1.48-1.57   | 1.53±0.58   | 1.95-2.55 | 2.33±2.13 | 0.70-1.18 | 1.03±0.72 | ≤3     | 0.00146 ** | 0.487 |

**Table S9.** Two-way ANOVA results for physicochemical and microbiological parameters based on the interactions between study area and sampling time. Df: degree of freedom; Sum Sq: Sum of Square; Mean Sq: Mean of Square. Sig.Level: Significant levels, \*(p<0.05), \*\*(p<0.01), \*\*\*(p<0.001).

| Parameter               | Variables           | Df | Sum Sq | Mean Sq | F value  | p value | Sig.Level |
|-------------------------|---------------------|----|--------|---------|----------|---------|-----------|
| <b>AT</b>               | Area                | 4  | 25.4   | 6.4     | 5.821    | <0.001  | ***       |
|                         | Month               | 2  | 1408.8 | 704.4   | 644.522  | <0.001  | ***       |
|                         | <b>Area x Month</b> | 8  | 46.8   | 5.8     | 5.349    | <0.001  | ***       |
|                         | Residuals           | 60 | 65.6   | 1.1     |          |         |           |
| <b>WT</b>               | Area                | 4  | 21.7   | 5.4     | 19.388   | <0.001  | ***       |
|                         | Month               | 2  | 1586.5 | 793.3   | 2831.752 | <0.001  | ***       |
|                         | <b>Area x Month</b> | 8  | 15.2   | 1.9     | 6.792    | <0.001  | ***       |
|                         | Residuals           | 60 | 16.8   | 0.3     |          |         |           |
| <b>pH</b>               | Area                | 4  | 7.259  | 1.8148  | 59.674   | <0.001  | ***       |
|                         | Month               | 2  | 0.689  | 0.3447  | 11.333   | <0.001  | ***       |
|                         | <b>Area x Month</b> | 8  | 0.629  | 0.0786  | 2.585    | 0.017   | *         |
|                         | Residuals           | 60 | 1.825  | 0.0304  |          |         |           |
| <b>EC</b>               | Area                | 4  | 90001  | 22500   | 8.104    | <0.001  | ***       |
|                         | Month               | 2  | 98640  | 49320   | 17.764   | <0.001  | ***       |
|                         | <b>Area x Month</b> | 8  | 22231  | 2779    | 1.001    | 0.445   |           |
|                         | Residuals           | 60 | 166587 | 2776    |          |         |           |
| <b>Chl <i>a</i></b>     | Area                | 4  | 364642 | 91160   | 66.289   | <0.001  | ***       |
|                         | Month               | 2  | 63629  | 31814   | 23.134   | <0.001  | ***       |
|                         | <b>Area x Month</b> | 8  | 91692  | 11462   | 8.334    | <0.001  | ***       |
|                         | Residuals           | 60 | 82512  | 1375    |          |         |           |
| <b>DO</b>               | Area                | 4  | 36.36  | 9.091   | 7.905    | <0.001  | ***       |
|                         | Month               | 2  | 40.45  | 20.227  | 17.587   | <0.001  | ***       |
|                         | <b>Area x Month</b> | 8  | 7.41   | 0.926   | 0.805    | 0.601   |           |
|                         | Residuals           | 60 | 69     | 1.15    |          |         |           |
| <b>KMnO<sub>4</sub></b> | Area                | 4  | 83.27  | 20.817  | 70.871   | <0.001  | ***       |
|                         | Month               | 2  | 5.75   | 2.875   | 9.786    | <0.001  | ***       |
|                         | <b>Area x Month</b> | 8  | 13.05  | 1.631   | 5.553    | <0.001  | ***       |
|                         | Residuals           | 60 | 17.62  | 0.294   |          |         |           |

|                         | Area         | 4  | 0.04247 | 0.010619 | 2.322   | 0.067   |           |
|-------------------------|--------------|----|---------|----------|---------|---------|-----------|
| <b>TP</b>               | Month        | 2  | 0.03835 | 0.019177 | 4.193   | 0.0198  | *         |
| <b>Area x Month</b>     | Area : Month | 8  | 0.09277 | 0.011596 | 2.535   | 0.019   | *         |
|                         | Residuals    | 60 | 0.27444 | 0.004574 |         |         |           |
|                         | Area         | 4  | 0.04325 | 0.010811 | 3.568   | 0.01122 | *         |
| <b>PO<sub>4</sub>-P</b> | Month        | 2  | 0.02753 | 0.013764 | 4.543   | 0.01455 | *         |
| <b>Area x Month</b>     | Area : Month | 8  | 0.07362 | 0.009202 | 3.037   | 0.00621 | **        |
|                         | Residuals    | 60 | 0.1818  | 0.00303  |         |         |           |
|                         | Area         | 4  | 14.04   | 3.51     | 4.163   | 0.00484 | **        |
| <b>TN</b>               | Month        | 2  | 9.31    | 4.654    | 5.52    | 0.0063  | **        |
| <b>Area x Month</b>     | Area : Month | 8  | 7.06    | 0.882    | 1.046   | 0.41254 |           |
|                         | Residuals    | 60 | 50.58   | 0.843    |         |         |           |
| Parameter               | Variables    | Df | Sum Sq  | Mean Sq  | F value | p value | Sig.Level |
|                         | Area         | 4  | 21.519  | 5.38     | 10.928  | <0.001  | ***       |
| <b>NH<sub>4</sub>-N</b> | Month        | 2  | 4.838   | 2.419    | 4.914   | 0.0106  | *         |
| <b>Area x Month</b>     | Area : Month | 8  | 4.852   | 0.606    | 1.232   | 0.2965  |           |
|                         | Residuals    | 60 | 29.537  | 0.492    |         |         |           |
|                         | Area         | 4  | 0.04059 | 0.010148 | 13.447  | <0.001  | ***       |
| <b>NO<sub>2</sub>-N</b> | Month        | 2  | 0.00272 | 0.001359 | 1.8     | 0.174   |           |
| <b>Area x Month</b>     | Area : Month | 8  | 0.01602 | 0.002002 | 2.653   | 0.0146  | *         |
|                         | Residuals    | 60 | 0.04528 | 0.000755 |         |         |           |
|                         | Area         | 4  | 0.931   | 0.2328   | 8.454   | <0.001  | ***       |
| <b>NO<sub>3</sub>-N</b> | Month        | 2  | 6.002   | 3.0008   | 108.978 | <0.001  | ***       |
| <b>Area x Month</b>     | Area : Month | 8  | 0.168   | 0.021    | 0.763   | 0.636   |           |
|                         | Residuals    | 60 | 1.652   | 0.0275   |         |         |           |
|                         | Area         | 4  | 115.64  | 28.91    | 257.36  | <0.001  | ***       |
| <b>TOC</b>              | Month        | 2  | 30.7    | 15.348   | 136.63  | <0.001  | ***       |
| <b>Area x Month</b>     | Area : Month | 8  | 30.74   | 3.843    | 34.21   | <0.001  | ***       |
|                         | Residuals    | 60 | 6.74    | 0.112    |         |         |           |
|                         | Area         | 4  | 8130    | 2032.4   | 8.545   | <0.001  | ***       |
| <b>COD</b>              | Month        | 2  | 2329    | 1164.3   | 4.895   | 0.0107  | *         |
| <b>Area x Month</b>     | Area : Month | 8  | 4676    | 584.5    | 2.458   | 0.0226  | *         |

|                     |              |    |        |        |        |        |     |
|---------------------|--------------|----|--------|--------|--------|--------|-----|
|                     | Residuals    | 60 | 14270  | 237.8  |        |        |     |
|                     | Area         | 4  | 106.8  | 26.693 | 3.051  | 0.0235 | *   |
| <b>BOD</b>          | Month        | 2  | 13.4   | 6.721  | 0.768  | 0.4683 |     |
| <b>Area x Month</b> | Area : Month | 8  | 75.4   | 9.423  | 1.077  | 0.3913 |     |
|                     | Residuals    | 60 | 524.9  | 8.748  |        |        |     |
|                     | Area         | 4  | 10.052 | 2.5129 | 14.41  | <0.001 | *** |
| <b>TC</b>           | Month        | 1  | 0.074  | 0.0737 | 0.423  | 0.519  |     |
| <b>Area x Month</b> | Area : Month | 4  | 1.374  | 0.3435 | 1.97   | 0.118  |     |
|                     | Residuals    | 40 | 6.976  | 0.1744 |        |        |     |
|                     | Area         | 4  | 14.028 | 3.507  | 16.137 | <0.001 | *** |
| <b>FC</b>           | Month        | 2  | 5.814  | 2.907  | 13.377 | <0.001 | *** |
| <b>Area x Month</b> | Area : Month | 8  | 1.666  | 0.208  | 0.958  | 0.477  |     |
|                     | Residuals    | 60 | 13.04  | 0.217  |        |        |     |
|                     | Area         | 4  | 15.277 | 3.819  | 14.239 | <0.001 | *** |
| <b>BacUni</b>       | Month        | 2  | 18.528 | 9.264  | 34.538 | <0.001 | *** |
| <b>Area x Month</b> | Area : Month | 8  | 8.313  | 1.039  | 3.874  | <0.001 | *** |
|                     | Residuals    | 60 | 16.093 | 0.268  |        |        |     |
|                     | Area         | 4  | 8.753  | 2.188  | 14.188 | <0.001 | *** |
| <b>HF183</b>        | Month        | 2  | 8.452  | 4.226  | 27.4   | <0.001 | *** |
| <b>Area x Month</b> | Area : Month | 8  | 11.902 | 1.488  | 9.647  | <0.001 | *** |
|                     | Residuals    | 60 | 9.254  | 0.154  |        |        |     |

**Table S10.** The specific explanations of each land use classification.

| No. | Land Use Classification               | Explanation                                                                                                                                                        |
|-----|---------------------------------------|--------------------------------------------------------------------------------------------------------------------------------------------------------------------|
| 1   | Administrative Land                   | Government agencies, non-profit organizations and other facility land                                                                                              |
| 2   | Agricultural Land                     | Arable land, forest land, farming land, grassland, agricultural facilities and the like                                                                            |
| 3   | Class A Industrial Land               | Pollution-free industrial land, minimal or no adverse influence to residential area or public environment                                                          |
| 4   | Class B Industrial Land               | Low-pollution industrial land, certain adverse influence to residential area or public environment                                                                 |
| 5   | Class C Industrial Land               | Severe adverse influence to residential area or public environment                                                                                                 |
| 6   | Commercial and Residential Mixed Land | Land used for both commercial and residential land                                                                                                                 |
| 7   | Commercial Land                       | All sorts of commercial, business and entertainment use facility                                                                                                   |
| 8   | Cultural Entertainment Land           | Libraries, exposition etc. cultural facility land                                                                                                                  |
| 9   | Education & Research Land             | Higher-education institution, secondary technical education institution, middle schools, primary schools, research institutions, as well as affiliated dormitories |
| 10  | High Density Residential Land         | High rise residence with relatively complete amenity                                                                                                               |
| 11  | Hospital                              | Hospital, clinic, health care, habitation related land                                                                                                             |
| 12  | Low Density Residential Land          | Low-rise residence                                                                                                                                                 |
| 13  | Logistic and Warehousing Land         | Land for cargo storage, transfer or delivery                                                                                                                       |
| 14  | Medium Density Residential Land       | Walk-ups residence with relatively complete amenity                                                                                                                |
| 15  | Municipal Utilities                   | Land for facilities providing services, environment and safety                                                                                                     |
| 16  | Public Greenland                      | Open for public primarily for recreational purpose                                                                                                                 |
| 17  | River & Lake                          | Non-development land, all sorts of water bodies                                                                                                                    |
| 18  | Road                                  | Urban road and traffic facility land                                                                                                                               |
| 19  | Plaza                                 | Urban public spaces for recreational, memorial, gathering purposes                                                                                                 |
| 20  | Undeveloped Land                      | Land not yet in use, such as saline land, sandy land, bare land, bare fertile land etc.                                                                            |

## Supplementary Figures

**Figure S1.** Surrounding environment near LiPuDang (LPD) sampling locations. LPD is surrounded by high percentage of public Greenland, agriculture land low density residential land.

LPD Location 1-5

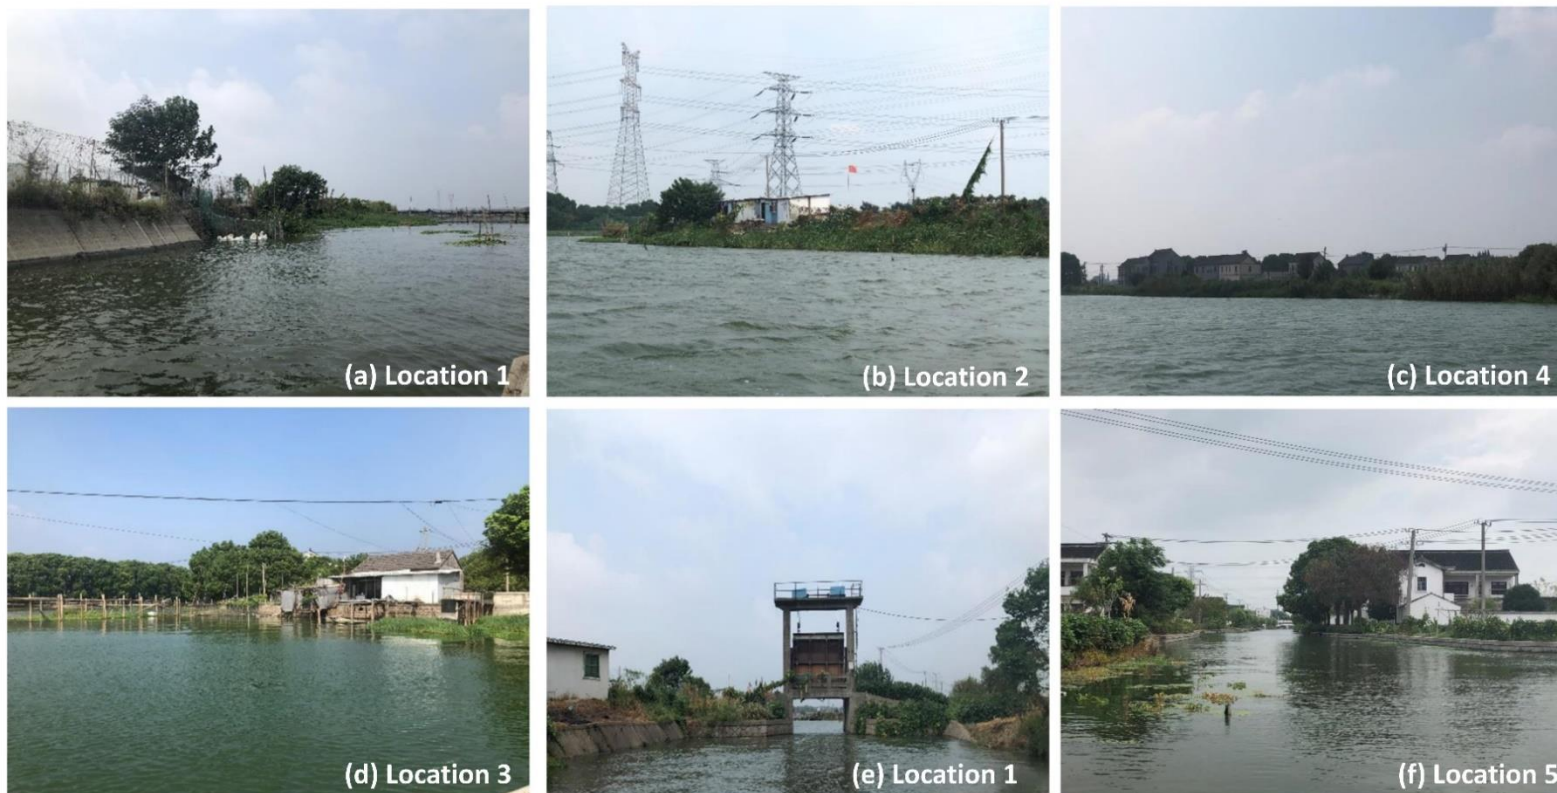

**Figure S2.** Surrounding environment near XiDaGang (XDG) sampling locations. XDG River flows through dense agriculture lands and is function as the direct source of agricultural water. The surrounding areas include Class B and C industrial lands.

XDG Location 6-10

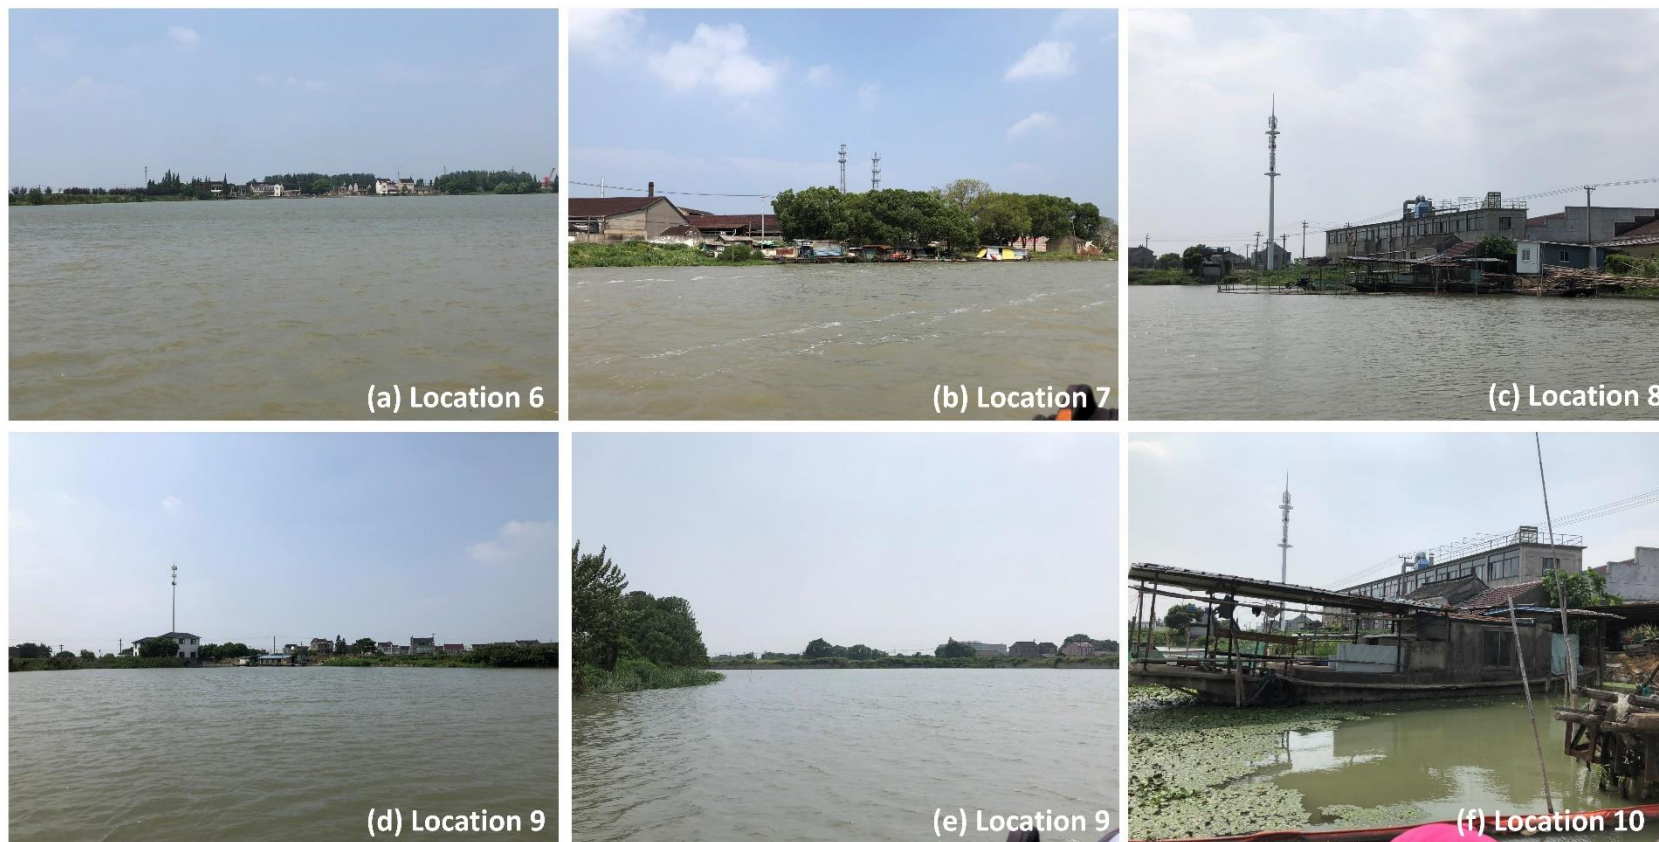

**Figure S3.** Surrounding environment near WFG sampling locations. WFG is a narrow river flows through dense class A industrial land with some public Greenland, providing direct source for industrial water but treated plant effluent of theses factories also come into this river.

WFG Location 11-15

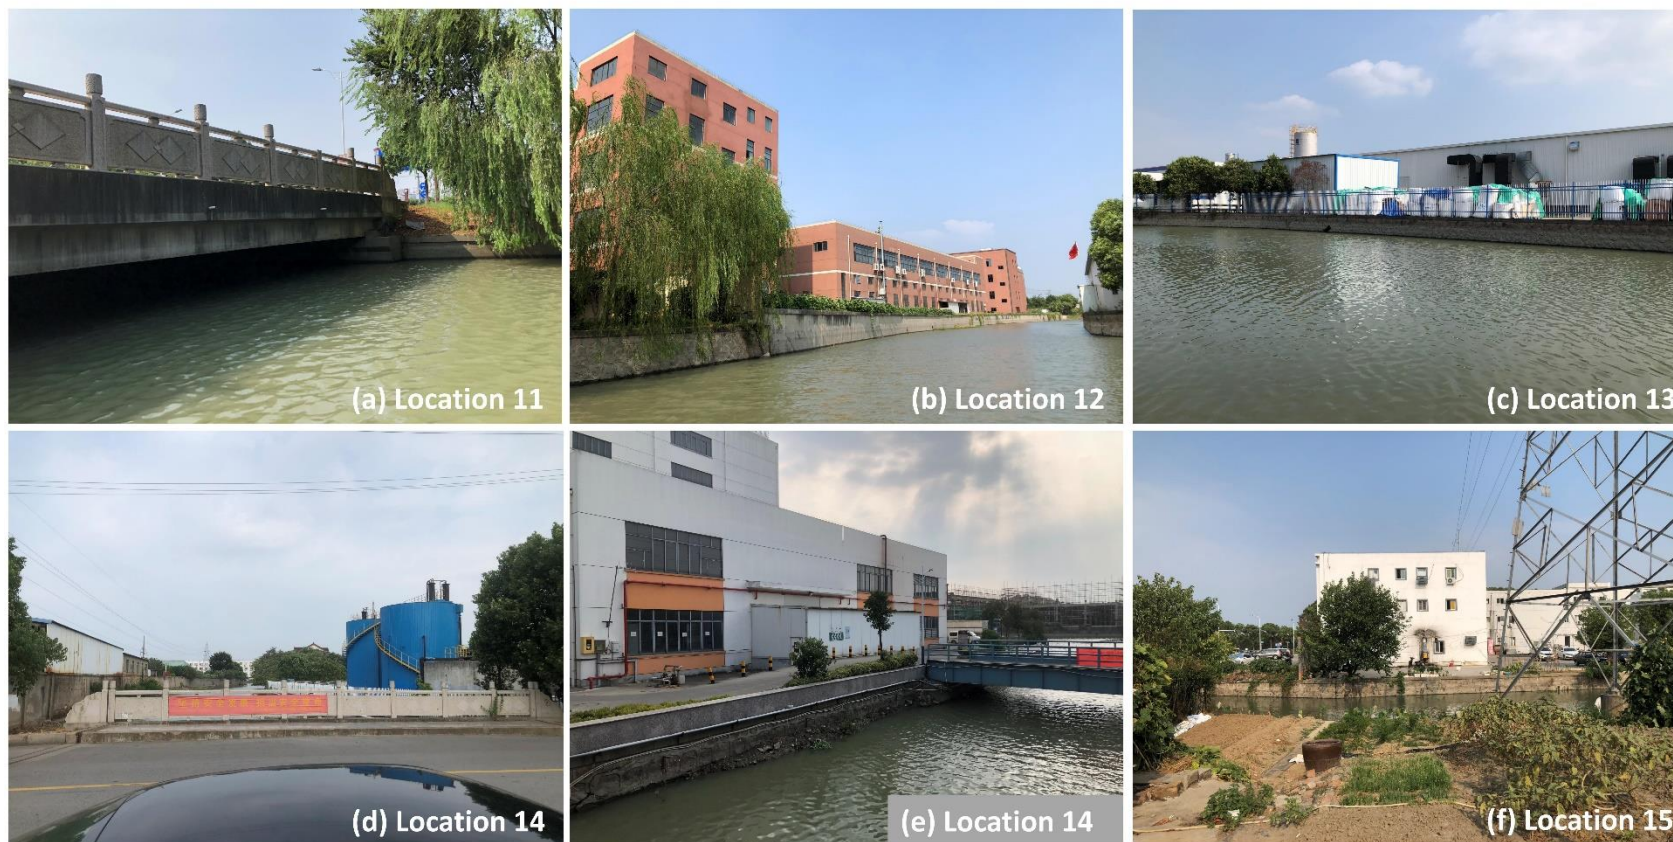

**Figure S4.** Surrounding environment near DaDeTang (DDT) sampling locations. DDT is a small river flows through public Greenland, agricultural land and Class A and B industrial lands.

DDT Location 16-20

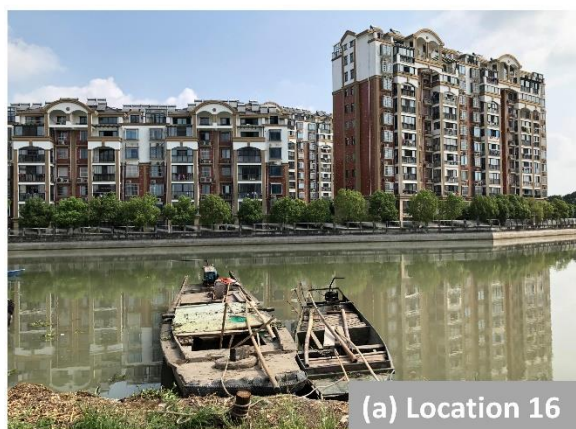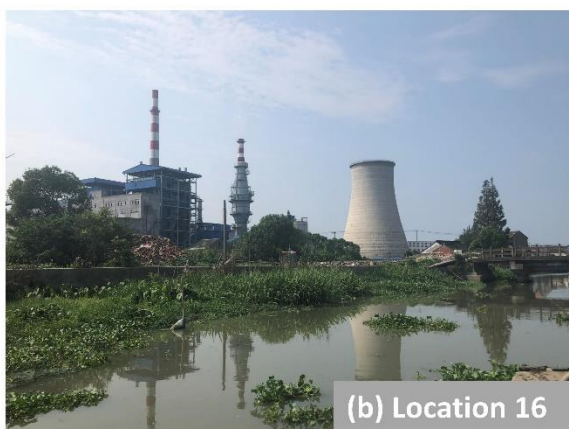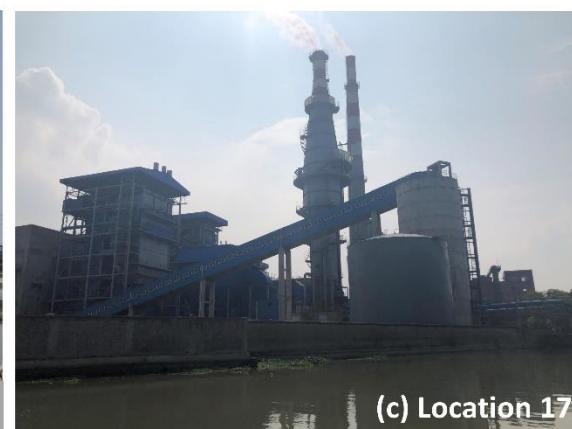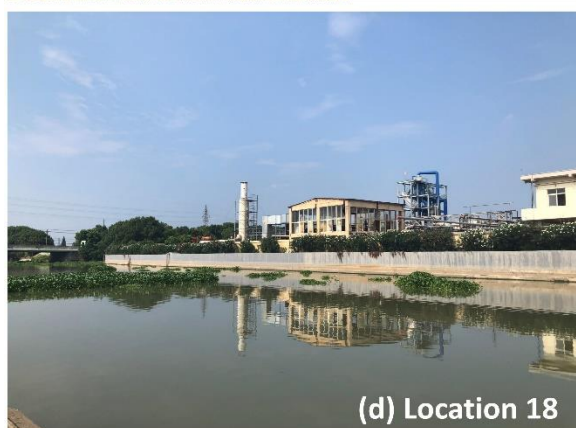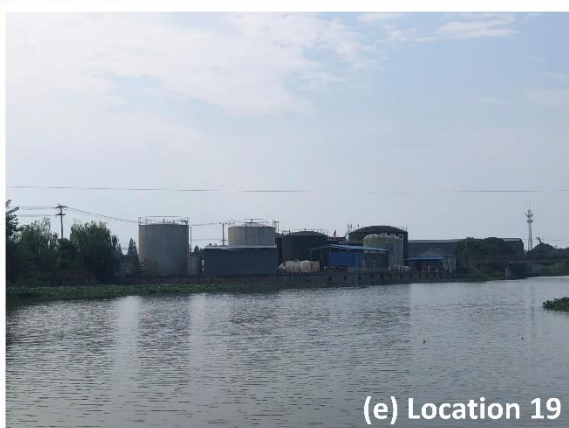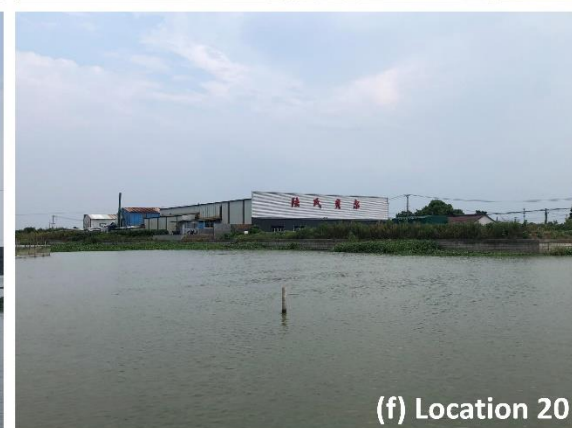

**Figure S5.** Surrounding environment near ZiXingTang (ZXT) sampling locations. ZXT is a long river flows through some tourist attractions of Wujiang, surrounded by mostly public greenland and large agricultural lands. Several class B industries are around this river (except location 22). A small proportion of class A industrial land are present around locations 21-24 and class C industrial land near location 25.

ZXT Location 21-25

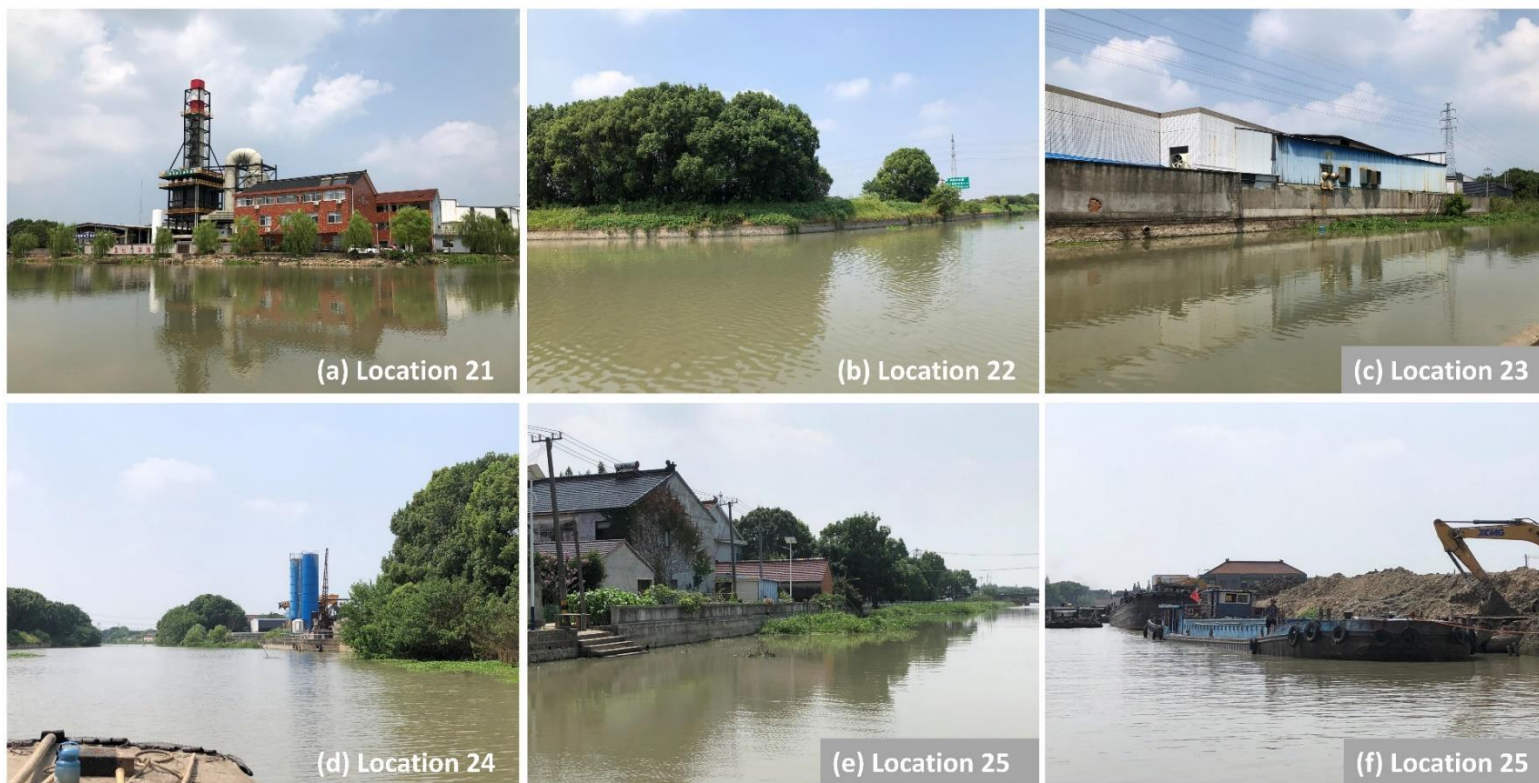

**Figure S6.** Spearman's correlation map of the physicochemical, microbiological and land use pattern percentages (if applicable) for a) LPD and b) XDG. Each correlation was presented by one coloured circle in the figure. The blue colour indicated positive correlations, while the red colour indicated negative correlations. Depth of the colours and sizes of the circles indicated strengths of the correlations. Non-significant ( $p>0.05$ ) correlations were presented by a cross on the circle. Factors were excluded if they were either unavailable or identical through locations.

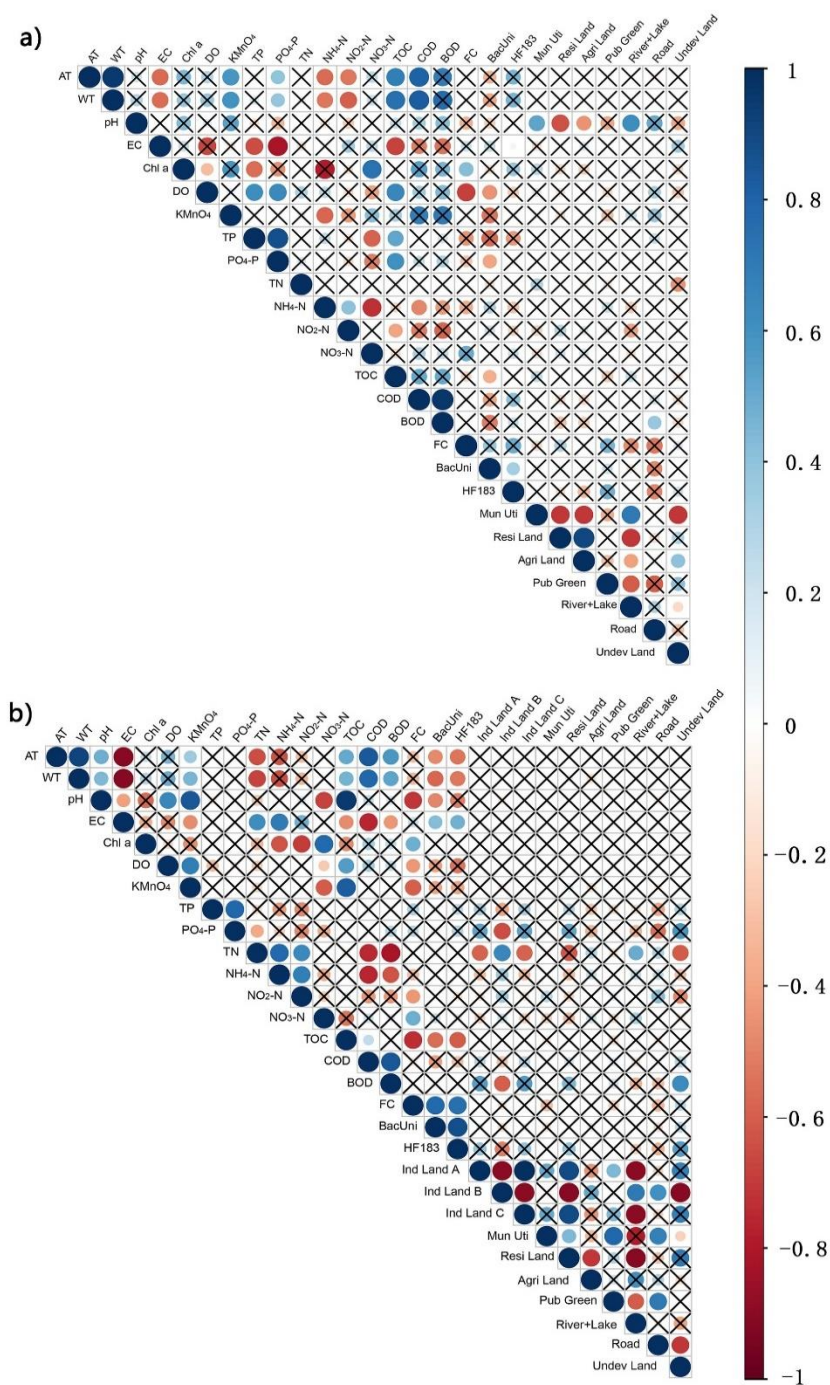

**Figure S7.** Spearman's correlation map of the physicochemical, microbiological and land use pattern percentages (if applicable) for a) WFG and b) DDT. Each correlation was presented by one coloured circle in the figure. The blue colour indicated positive correlations, while the red colour indicated negative correlations. Depth of the colours and sizes of the circles indicated strengths of the correlations. Non-significant ( $p>0.05$ ) correlations were presented by a cross on the circle. Factors were excluded if they were either unavailable or identical through locations.

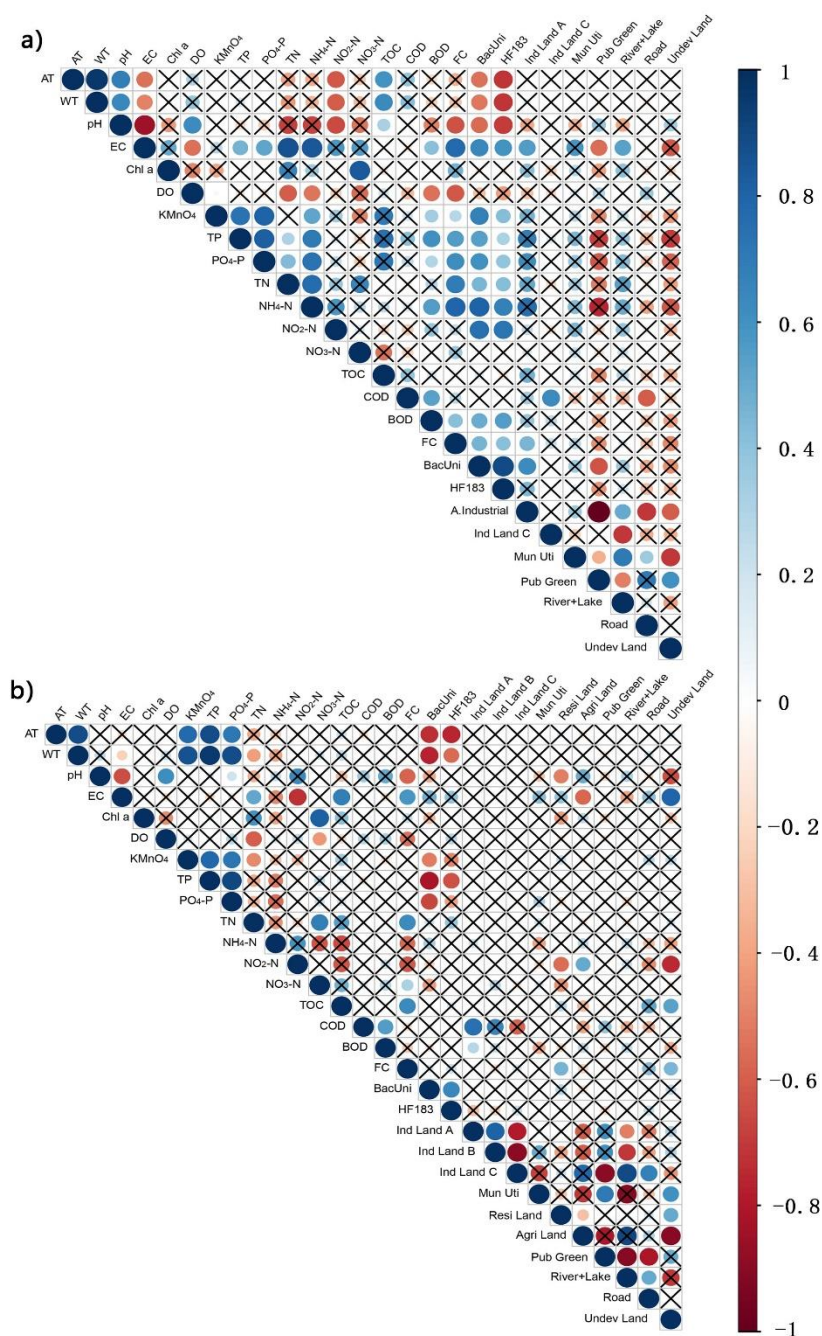

**Figure S8.** Spearman's correlation map of the physicochemical, microbiological and land use pattern percentages (if applicable) for a) ZXT and b) Control area. Each correlation was presented by one coloured circle in the figure. The blue colour indicated positive correlations, while the red colour indicated negative correlations. Depth of the colours and sizes of the circles indicated strengths of the correlations. Non-significant ( $p>0.05$ ) correlations were presented by a cross on the circle. Factors were excluded if they were either unavailable or identical through locations.

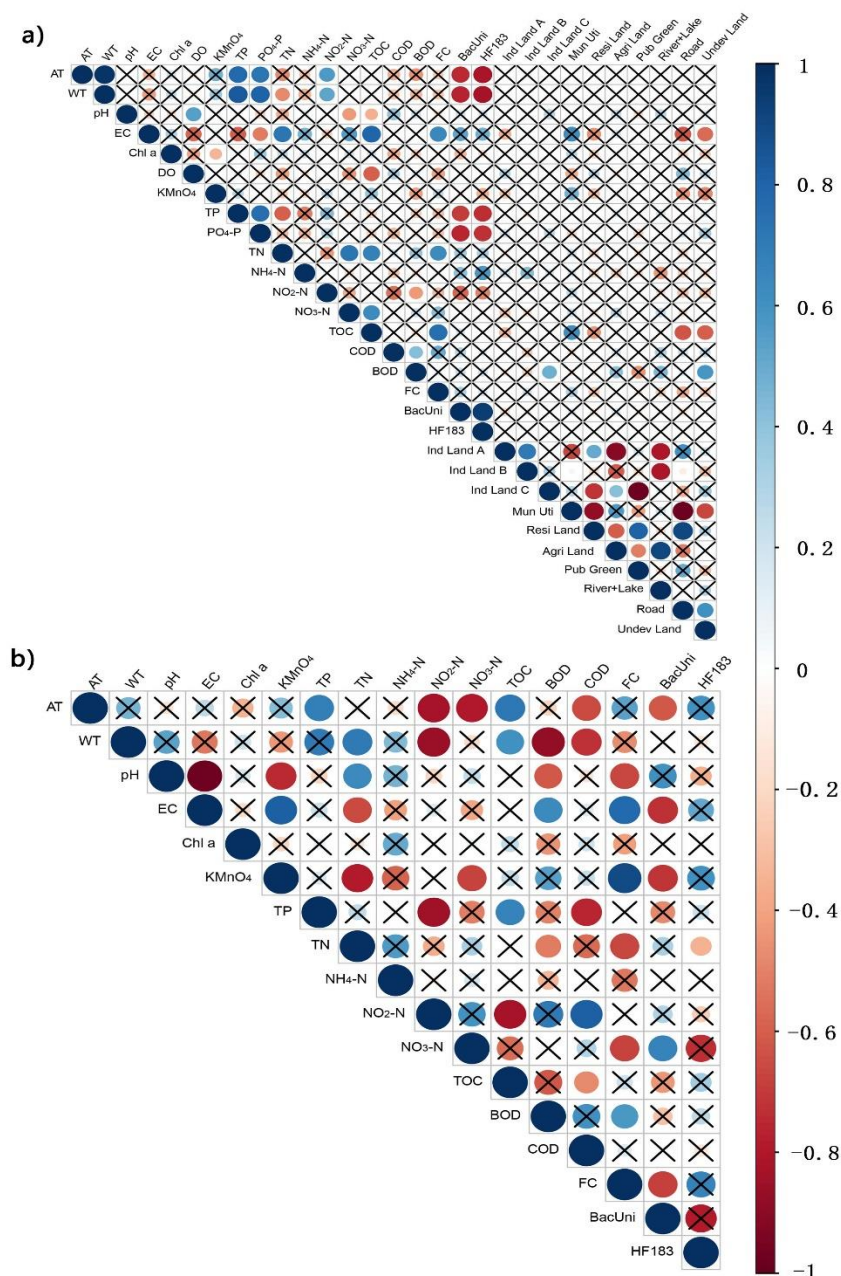

### Spearman correlations between variables (Figures S6-S8)

**Figure S6a. LiPuDong (LPD) Lake:** The correlations among the LPD samples showed little significance. EC, NH<sub>4</sub>-N and NO<sub>2</sub>-N were negatively correlated to both AT and WT, while KMnO<sub>4</sub>, PO<sub>4</sub>-P, TOC and COD were positively correlated with temperatures. EC correlated negatively with TP, PO<sub>4</sub>-P and TOC, which were well inter-correlated. The pH was higher around municipal utilities, lakes and rivers and lower around low-density residential land and agricultural land. Chl *a* correlated well and positively with NO<sub>3</sub>-N. NH<sub>4</sub>-N and NO<sub>2</sub>-N were also correlated positively with each other.

**Figure S6b. XiDaGang (XDG) River:** In XDG, EC, TN and the fecal MST markers BacUni and HF183 were negatively correlated with temperatures. The pH, TOC, COD, BOD and KMnO<sub>4</sub> were well positively correlated with temperatures. The pH increased DO, KMnO<sub>4</sub> and TOC, while it decreased with EC, NO<sub>3</sub>-N and fecal contamination. EC correlated negatively with KMnO<sub>4</sub>, TOC, COD and BOD, but positively with TN, NH<sub>4</sub>-N and fecal MST markers. TP and PO<sub>4</sub>-P were strongly positively correlated. TN had a positive relationship with NH<sub>4</sub>-N and NO<sub>2</sub>-N, but not with NO<sub>3</sub>-N. Meanwhile, TN and NH<sub>4</sub>-N were also negatively correlated with COD and BOD. TOC had a negative correlation with the fecal contamination parameters. As for land uses, TN was correlated negatively with class A and C industrial lands and undeveloped land, yet positively with class B industrial land, river and lake. A negative correlation was observed between PO<sub>4</sub>-P and class B industrial land. BOD correlated negatively with class B industrial land and positively with undeveloped land.

**Figure S7a WuFangGang (WFG) River:** In WFG, EC, NO<sub>2</sub>-N and the fecal MST markers were negatively correlated with AT and WT, while pH and TOC positively correlated with temperatures. The pH had strong and significant negative correlations with EC, NO<sub>2</sub>-N and fecal contamination parameters, and it correlated positively with DO and TOC. Almost oppositely, EC correlated negatively with DO, but positively with P and N nutrient parameters and fecal contamination parameters. Chl *a* levels associated well with NO<sub>3</sub>-N levels. In this river, KMnO<sub>4</sub>, TP, PO<sub>4</sub>-P, TN and NH<sub>4</sub>-N were found to have similar trends. These nutrient-related parameters also correlated well with fecal and organic pollution parameters (BOD, FC, BacUni and HF183). Class A industrial land showed positive correlations with EC, FC and BacUni, while class C industrial land correlated positively only with COD. Public green land had negative relationships with EC and BacUni. River and lake correlated positively with EC, and road correlated negatively with COD.

**Figure S7b. DaDeTang (DDT) River:** Only a few significant correlations were observed in DD. The fecal MST markers were negatively correlated with AT and WT, while KMnO<sub>4</sub>, TP, PO<sub>4</sub>-P positively correlated with temperatures. The pH changed positively with DO and PO<sub>4</sub>-P, and negatively with EC, FC and percentages of low-density residential land. EC correlated positively with TN, TOC, FC and percentages of undeveloped land. EC also had a negative relationship with NO<sub>2</sub>-N and percentages of agricultural land. Similar to the other rivers or lakes, Chl *a* levels correlated well with NO<sub>3</sub>-N levels. Strong correlations were observed among KMnO<sub>4</sub>, TP and PO<sub>4</sub>-P. Different to other rivers or lake, TN in DDT correlated positively only with NO<sub>3</sub>-N and FC, indicating that the possible main source of TN in DDT was NO<sub>3</sub>-N. NO<sub>2</sub>-N correlated negatively with low-density residential land and undeveloped land percentages, while it positively correlated with percentages of agricultural land. TOC had a

positive relationship with both FC and undeveloped land. COD correlated strongly and positively with class A industrial land. FC correlated positively with low-density residential land and undeveloped land percentages.

**Figure S8a. ZiXingTang (ZXT) River:** In ZXT, the fecal MST markers had very strong negative correlations with AT, WT, TP and PO<sub>4</sub>-P. This might be due to a sharp increase of fecal contamination in the month of October, when the temperatures dropped. TP, PO<sub>4</sub>-P and NO<sub>2</sub>-N were positively correlated with temperatures. EC positively correlated with TN, TOC, FC, and negatively with PO<sub>4</sub>-P. TP and PO<sub>4</sub>-P were well positively correlated, similar to the other study areas. TN in DDT correlated positively mainly with NO<sub>3</sub>-N, TOC and FC, indicating that NO<sub>3</sub>-N was possibly the main source of TN in this area. FC levels correlated positively with EC, TN and TOC. Land use patterns did not correlate much with the physico-chemical parameters. Percentages of class C industrial land and undeveloped land correlated positively with BOD. Undeveloped land also had a negative correlation with EX and TOC. TOC also had a negative relationship with percentages of roads.

**Figure 8b. Control locations:** The control sample size was smaller in total, compared to the other study areas. Non-significant correlation were easily observed. Generally TN, TP and TOC decreased with sampling times and temperatures. However, increased NO<sub>2</sub>-N, NO<sub>3</sub>-N, BOD and COD were observed in colder weathers. The pH correlated negatively with EC, KMnO<sub>4</sub>, BOD and FC, but positively with TN. On the contrary, EC correlated positively with EC, KMnO<sub>4</sub>, BOD and FC, but negatively with TN and BacUni. KMnO<sub>4</sub> levels changed negatively.
